# Supplementary material for: Global gene expression profiling of brown to white adipose tissue transformation in sheep reveals novel transcriptional components linked to adipose remodeling
Source: PubMed Central journal article supplement (PMC4407871; doi:10.1186/s12864-015-1405-8), 2015-03-19

# Additional file 8: Figure S3

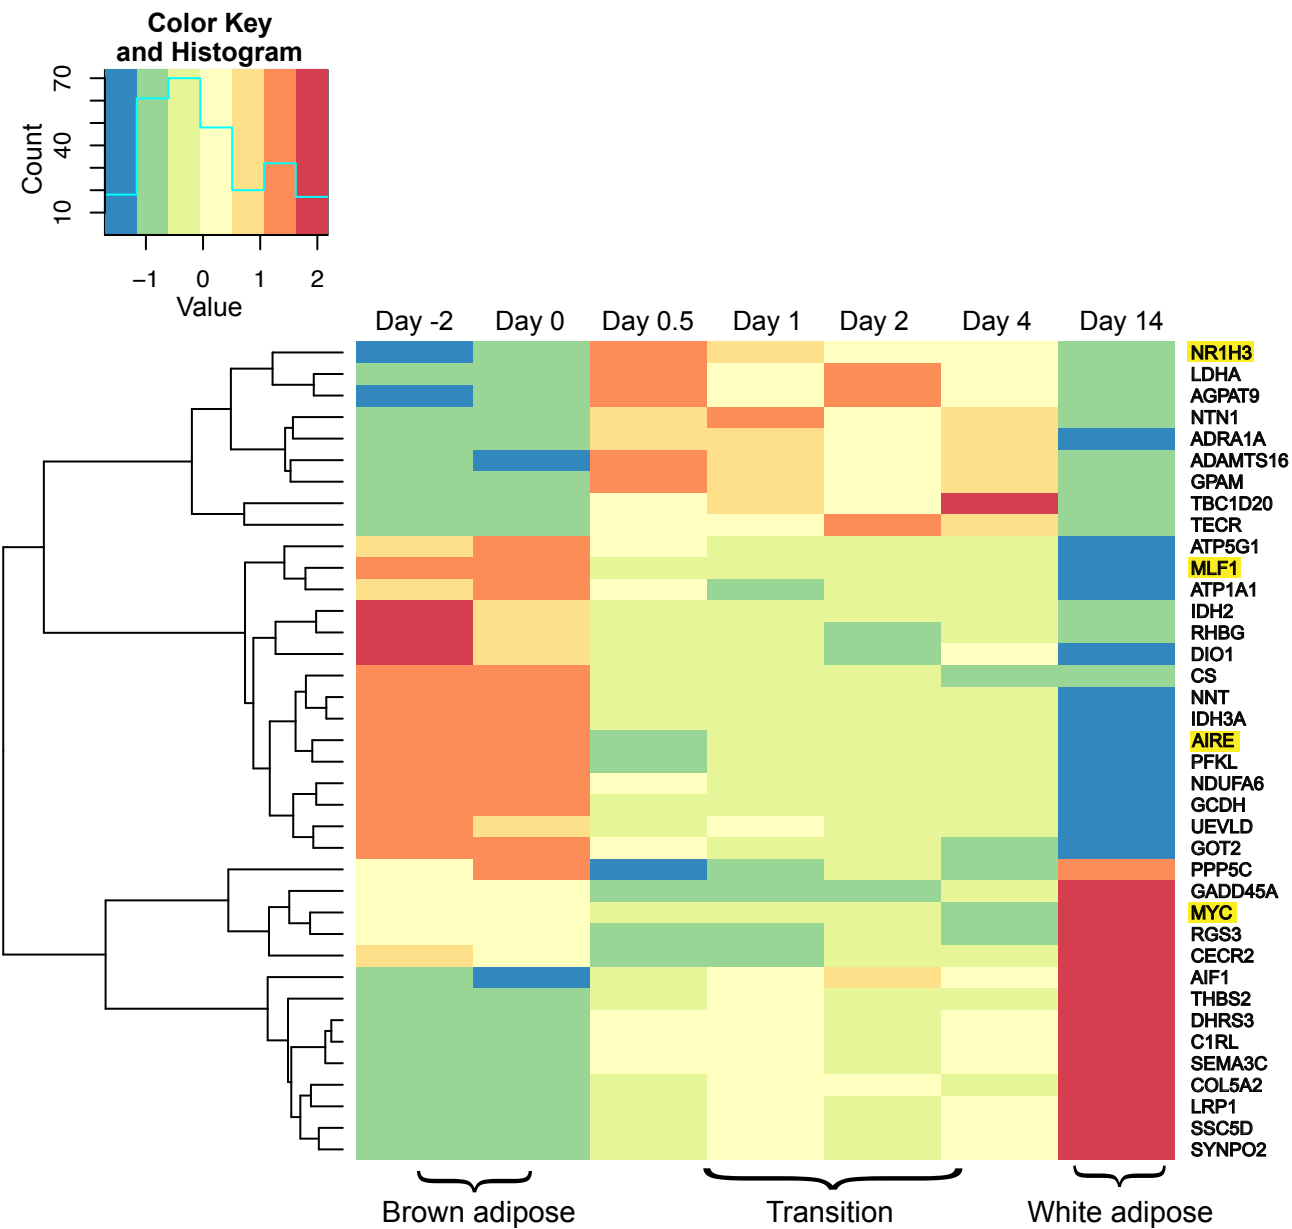

Supplement: 12864_2015_1405_MOESM8_ESM.pdf [file 12864_2015_1405_MOESM8_ESM.pdf]
